# Supplementary material for: Direct Effect of Chenodeoxycholic Acid on Differentiation of Mouse Embryonic Stem Cells Cultured under Feeder-Free Culture Conditions
Source: Hindawi journal article supplement (doi:10.1155/2013/375076), 2012-12-29

# Supplement 1

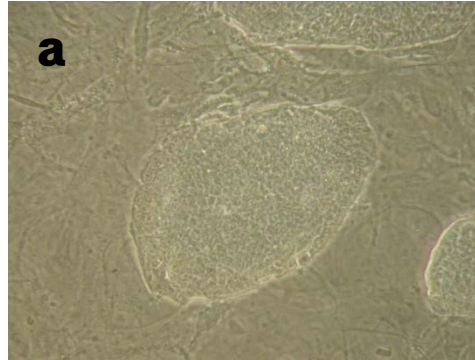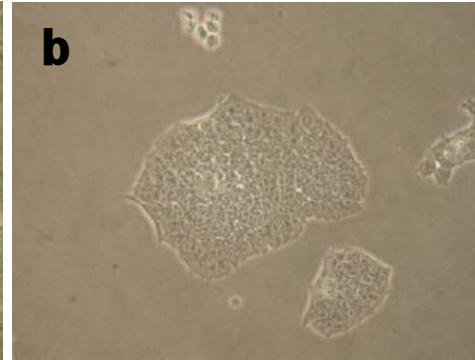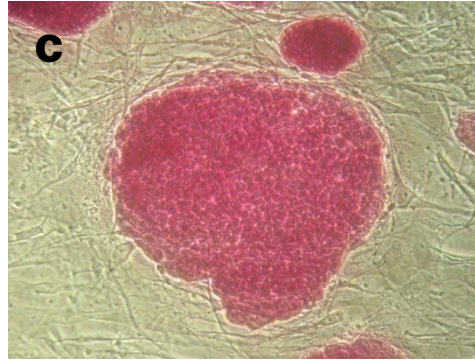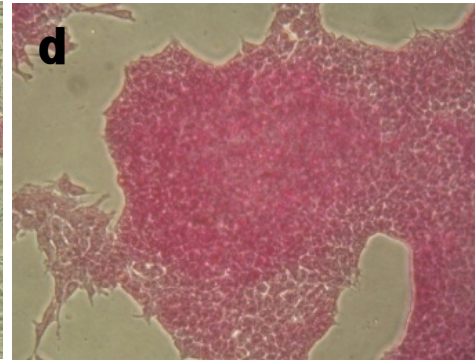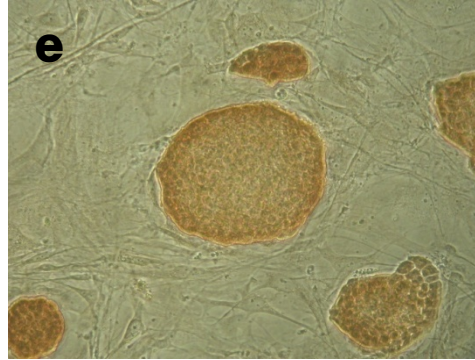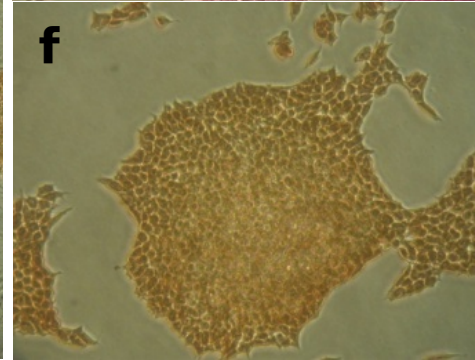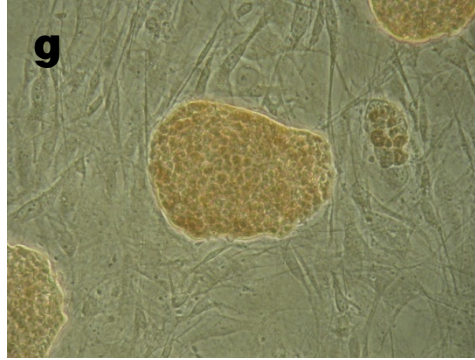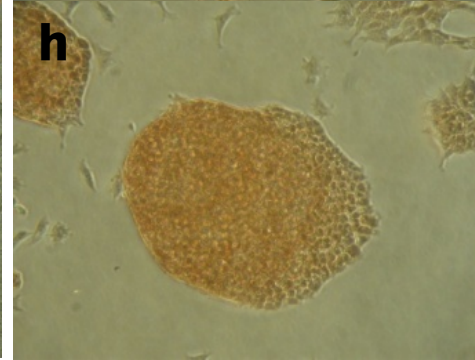

50  $\mu$ m

## Supplement 2

LIF

0.1% DMSO

50

100

200

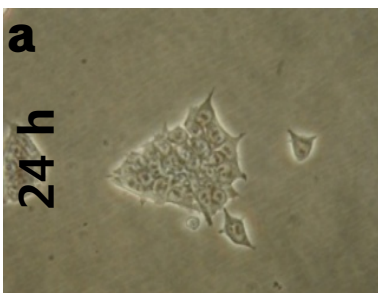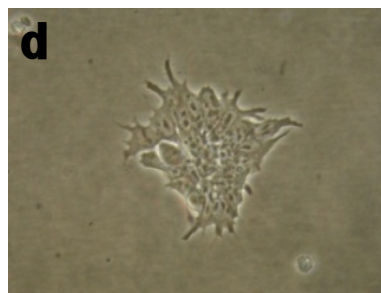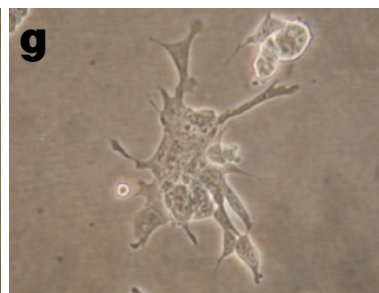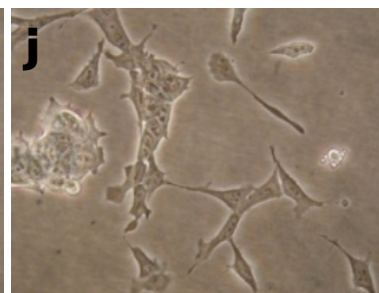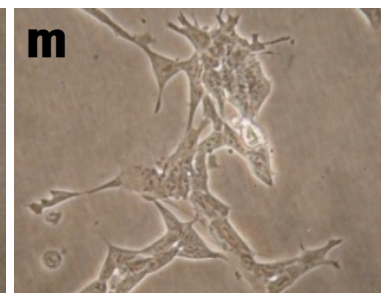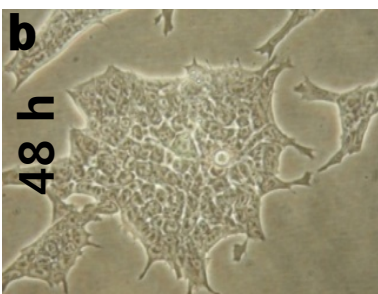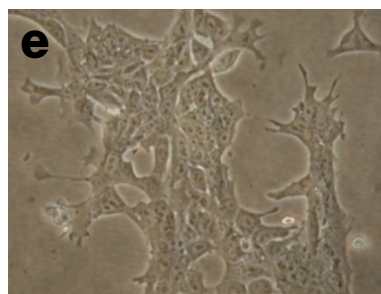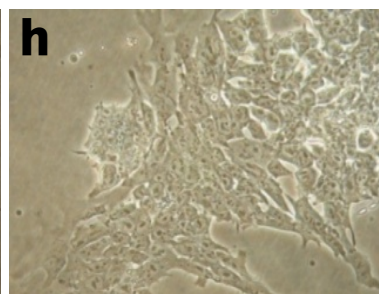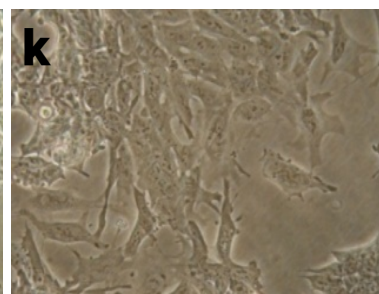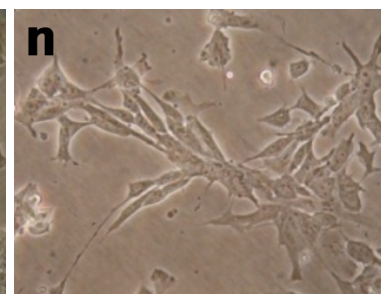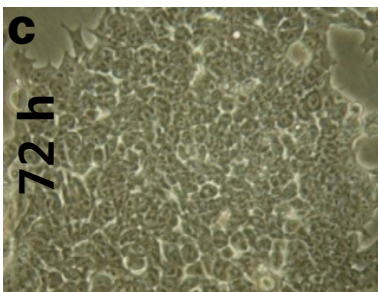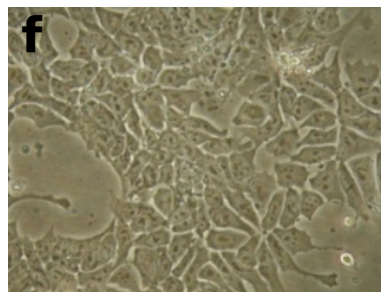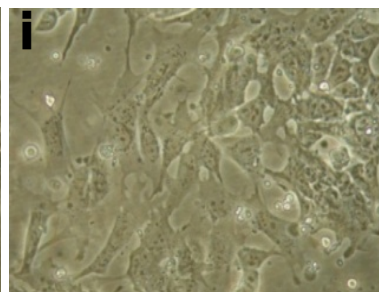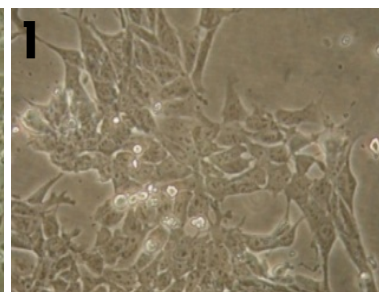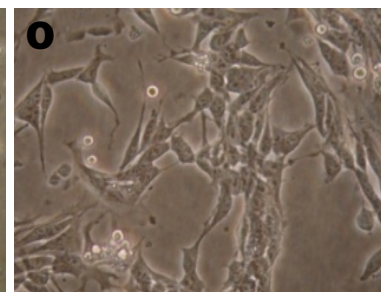

50  $\mu$ m

## Supplement 3

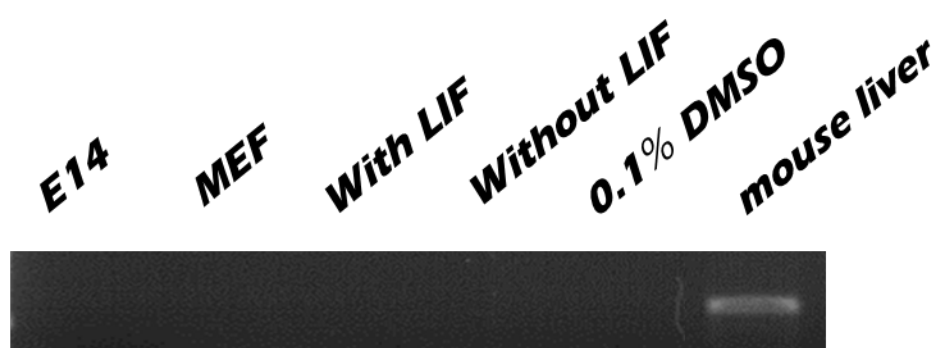

Supplement: f1 [file 375076.f1.pdf]
